# Supplementary material
Source: publisher figshare collection journal article supplement (https://geolsoc.figshare.com/ndownloader/files/21902700)
Supplement: Supplementary file 1 [file 21902700]

## Sheet: Table 3
Table 3. Sediment budget statistics of each DoD threshold
	Threshold (cm)
	10	30	50
Percent area of detectable change	0.29	0.05	0.02
Total Area of Erosion (m2)	6840755	1355150	550096
Total Area of Deposition (m2)	5941665	834554	320057
Total Volume of Erosion (m3)	1811397	908895	605940
Total Volume of Deposition (m^3)	1209187	451998	256386
Total Net Volume Difference (m3)	-602210	-456897	-349554
Percent (by volume) Erosion	0.6	0.67	0.7
Percent (by volume) Deposition	0.4	0.33	0.3
